# Supplementary material
Source: PubMed Central journal article supplement (PMC5519369)

## Supplemental Figure Legends

### Supplemental Figure 1:

#### Extension of Figure 2A with additional examples of axonal enrichment of transfected versions of Tau<sup>D2</sup>

Different isoforms of Tau<sup>D2</sup> were cotransfected with tdTomato for 6 days into primary neurons (7DIV) derived from TauKO as indicated. tdTomato was used as a volume and morphology marker. Columns 1,2, are the same as Fig. 2A and shown for comparison.

Transfected Tau was stained with an antibody against human Tau (CP27). A biased distribution (axonal enrichment) appears for Tau in most cases, in contrast to the unbiased distribution of tdTomato. Green color in merged images indicates enrichment of Tau. Arrowheads indicate the axon, arrows indicate dendrites.

Transfected isoforms are indicated, mutations are on the basis of 2N4R-Tau. Note that axonal enrichment is strongest for 0NxR isoforms (columns 1,2,10), and least pronounced for 2N4R-Tau (columns 5,6). Other Tau isoforms show intermediate to strong axonal enrichment (columns 3,4,7,8,9). Note that shown mutations of Tau are sorted stronger in the axon than unmodified 2N4R-Tau (columns 11,12,13).

### Supplemental Figure 2:

#### Extension of Figure 2B with additional examples of axonal enrichment of transfected versions of Tau<sup>D2</sup>

Different isoforms of Tau<sup>D2</sup> were cotransfected with tdTomato for 6 days into primary neurons (7DIV). Wildtype neurons expressing endogenous Tau in addition to transfected exogenous Tau<sup>D2</sup> (stained with CP27, green color). Exogenous and endogenous Tau is stained with a panTau antibody (K9JA), dendrites are stained with an antibody against MAP2. Columns 1,2,4,5,6 are the same as Fig. 2B and shown for comparison.

A biased distribution (axonal enrichment) appears for Tau in most cases, in contrast to the unbiased distribution of tdTomato (red color). Green color in merged images indicates enrichment of Tau. Arrowheads indicate the axon, arrows indicate dendrites.

**Columns 1, 2:** 0N4R-Tau is enriched in the axon. As a result, axonal Tau concentration is higher than in neighboring untransfected axons where only endogenous Tau is present, but can barely be detected in dendrites with a panTau antibody. Col 2, bottom shows magnified images from boxed areas, axon is indicated by arrowheads.

**Columns 3:** 1N4R is apparent in the axon.

**Columns 4, 5:** 2N4R-Tau is very little present in the axon, enrichment (compared to the dendrite) is not apparent (note similar color of red-green merge of axon compared to dendrite).

**Columns 6,7,8:** 2N4R-Tau pseudophosphorylated at the KXGS-motifs (KXGS-motifs phosphorylated to KXGE, column 6), or carrying the mutation deltaK2802P (column 7) or A152T (columns 8), show strong axonal enrichment compared to unmutated 2N4R-Tau.

### Supplemental Figure 3:

#### Structural components of the AIS contribute to the tightness of the retrograde and anterograde Tau Diffusion Barrier.

**(A,B)** Major structural components of the AIS contribute to the retrograde TDB integrity. Primary cortical neurons were cotransfected with 2N4R-Tau<sup>PSCFP2</sup> and shRNA (either control or shRNA against an AIS constituent, as indicated).

**(A)** Representative pictures 1h after photoconversion of 2N4R-Tau in the axon (indicated by red rectangles). While in control condition 2N4R-Tau does not reach the cell body (A1, red circle), in cells that have been transfected with shRNA for knocking down EB1 Tau appears in the cell body (A2, red circle).

**(B)** Diagram shows quantification of cell body intensities in the photoconverted channel 1h after photoconversion. Knockdown of several proteins known to be major structural components of

the AIS (e.g. Ankyrin G, NaV,  $\beta$ IV-spectrin, EB1, EB3, NrCAM) but not of an unrelated control (Spastin) leads to retrograde propagation of Tau from the axon into the soma.

**(C)** Major structural components of the AIS contribute to the anterograde TDB integrity. Primary cortical neurons were cotransfected with 2N4R-Tau<sup>D2</sup> and shRNA (either control or shRNA against an AIS constituent, as indicated) plus a volume marker (tdTomato).

Cotransfection of 2N4R-Tau<sup>D2</sup> and tdTomato reveals little propagation of Tau into the axon in control conditions (C1), but enhanced axonal enrichment in case of knockdown of EB1 (C2), arrows indicate the axon.

**(D)** Quantification of axonal presence (relative to the cell body) of 2N4R-Tau<sup>D2</sup> and MAP2 invasion into the proximal axon. Note that in most knockdowns MAP2 levels in the proximal axon increase, but only in some cases (AnkG,  $\beta$ IV-spectrin, EB1) Tau presence increases.

#### **Supplemental Figure 4:**

##### **Knockdown of AIS structural components does not result in endogenous missorting of Tau into the soma.**

Primary cortical neurons DIV9-11 were transfected with shRNA constructs as indicated plus tdTomato as a transfection marker.

**(A)** Overview images of transfected cells (red color) and stainings against Tau (antibodies K9JA and DA9, green color) and against the AIS structural components (in the examples shown 2<sup>nd</sup> antibody control (A1), EB1 (antibody 5/EB1; A2) and NrCAM (rabbit polyclonal antibody; A3). Boxed areas are magnified in B, D, E as indicated.

**(B)** Magnified images of control cells and knockdowns of EB1 from (A1, A2). There is no accumulation of Tau in the cell body (cell body circumference is indicated by dotted line).

**(C)** Quantification of Tau in the cell body shows that knockdown of structural components of the AIS (as indicated) does not lead to missorting of Tau.

**(D,E)** Example of successful knockdown of EB1 (D2, compare with control cell of D1) and NrCam (E2, compare with control cell of E1).

#### **Supplemental Figure 5:**

##### **GSK3 $\beta$ transfection results in missorting of endogenous Tau**

**(A)** Primary rat hippocampal neurons 18DIV were transfected with GSK3 $\beta$  fused to RFP via adenovirus mediated gene transfer for 3d. Asterisks indicate transfected cells. Tau was stained with an antibody against total Tau (K9JA), Tau phosphorylated at the KXGS-motifs was stained using 12E8 antibody.

**(A1)** Left panels: GSK3 $\beta$  transfected cells show missorting of Tau and enhanced phosphorylation at KXGS-motifs (arrows), while neighboring cells do not show presence of Tau in dendrites, and only background phosphorylation at the KXGS-motifs.

Right panels: Treatment of a culture transfected with GSK3 $\beta$  results in missorting of Tau also in cells not transfected with GSK3 $\beta$  (arrowheads), but with thinner dendrites than the cells expressing GSK3 $\beta$  (arrows). Treatment with A $\beta$  does not increase missorting of Tau in GSK3 $\beta$  transfected cells.

**(A2)** Quantification of A1 reveals significant differences between cells treated with A $\beta$  and GSK3 $\beta$ .

**(B)** Primary neurons aged 20DIV were treated with A $\beta$  and phosphorylation of GSK3 $\beta$  was examined with an antibody recognizing GSK3 $\beta$  when phosphorylated at S9.

**(B1)** Quantification of pGSK3 $\beta$  (indicative of inactivated GSK3 $\beta$ ) show a steam rise after 5-30min of A $\beta$ -treatment, and a return to baseline within 3 hours.

**(B2)** Representative images of a control cell (upper panel) and a cell treated with A $\beta$  for 15min (lower panel). The latter shows increased levels of GSK3 $\beta$  phosphorylation at S9 both in the cell body (asterisk) and the dendrites (arrows).

**Supplemental Figure 6:**

**Wildtype and constitutively active, but not inactive, GSK3 $\beta$  results in missorting of Tau and increased density of dendritic microtubules.**

GSK3 $\beta$  was transfected as wildtype (left panels), active form (S9A mutant, middle panels) and inactive form (S9E mutant, right panels) for 5d in rat cortical primary neurons 10DIV, cells were then fixed and stained as indicated.

**(A)** Wildtype and active GSK3 $\beta$ , but not inactive GSK3 $\beta$ , induce increase of microtubule density in dendrites. Cells were fixed, extracted and stained for microtubules. Arrows indicate dendrites (A1), which are magnified in A2.

**Supplemental Figure 7:**

**Volume normalization of measurements shown in Figure 4 and pictograms demonstrate that microtubule PTM are different in the cell body, AIS and axon.**

Thin lines show measurements, thick lines show moving averages of measurements.

**(A-C)** Volume normalization of measurements shown in Figure 4. Values of A-C are calculated by dividing values presented in Figure 4 by values of tdTomato shown in (D) and rescaled for illustration.

**(A)** Tyrosination of microtubules rapidly decreases from the cell body through the AIS to attain very low levels in the axon.

**(B)** Acetylation of microtubules is very low at the beginning of the AIS, intermediate in the cell body and the distal AIS, and high in the axon.

**(C)** Polyglutamylation is very low in the cell body and the beginning of the AIS but rapidly increases within the AIS and attains high levels in the axon.

**(D)** Not normalized intensity measurements of the volume marker for tdTomato show the differences of volumes throughout the different compartments, assuming unbiased distribution of tdTomato.

**Supplemental Figure 8:**

**A $\beta$  is targeted to the AIS and reduces AIS levels of F-actin and AnkyrinG**

Rat primary cortical neurons 21 DIV were exposed for 1h to 1 $\mu$ M A $\beta$  oligomers and stained as indicated.

**(A)** Primary rat neurons were exposed to A $\beta$  for 1h, fixed and stained for A $\beta$  with a monoclonal antibody which does not recognize APP (DE2), for the AIS with an antibody against NrCAM, and MAP2 to identify dendrites. Boxed areas in the left panel are shown magnified on the right. Dendritic spines and dendrites show strongest targeting by A $\beta$ , AIS shows little targeting by A $\beta$ , while axons are largely devoid of A $\beta$  targeting. Lower right panel shows quantification of immunofluorescence intensities in the different compartments as indicated by letters a (dendrites), b (AIS) and c (axon).

**(B)** Neurons stained for AnkyrinG and MAP2 to identify and measure fluorescence intensities within the AIS.

**(C)** Measurements along the AIS indicated a localized decrease of f-actin within the central part of the AIS (C1), i.e. within the first 5-10 $\mu$ m, and an overall decrease of AnkyrinG (C2) already after 1h of treatment. This indicates that although the AIS might overall be slightly affected, the F-actin decrease is predominant in the central part. (C3) shows statistical significance of the AnkyrinG measurements in C2 when comparing the Area under the curve (AUC, 0-15 $\mu$ m) after background subtraction (1000 units).

**Supplemental Figure 9:**

**Tau<sup>D2</sup> shows no signs of aberrant degradation in N2a cells and primary neurons**

**(A,B)** Tau<sup>D2</sup> is not degraded in neuroblastoma cells after photoconversion. N2a neuroblastoma cells were transfected with Tau<sup>D2</sup> and subsequently cultured for two days. Cells in the whole field were then photoconverted and the intensity of photoconverted Tau<sup>D2</sup> was followed for 20 hours.

**(A)** Images show examples of photoconverted cells before (upper left) and after photoconversion as indicated. Note that the upper and lower cell have divided at 12h. Cells show membrane associated fluorescence indicative of the membrane association of Tau.

**(B)** Quantification of the field of (A) reveals that there is no decrease after 1h of photoconversion, and only a trend to decreased intensities after 5-20h possibly caused by internal Tau relocalization (membrane trapping away from the confocal volume) or bleaching.

**(C1,2)** Tau<sup>D2</sup> does not get degraded in primary neurons. Primary cortical neurons 7-8DIV were transfected with Tau<sup>D2</sup> for 3d and then treated with cycloheximide (CHX) to block protein synthesis for up to 24h. Cells were lysed and immunoblotted with an antibody against total Tau (K9JA). There is no apparent decrease in protein levels of Tau<sup>D2</sup>, in contrast to endogenous Tau.

## Supplemental Tables

Supplemental Table 1: Summary of the phenotypes in primary forebrain neurons induced by low expression of Tau<sup>D2</sup> isoforms.

| Tau clone nomenclature | Isoform of Tau | mutation | Axonal enrichment of hTau | Spine number* | Spine length* | Spine maturity* /** | Dendrite length |
|------------------------|----------------|----------|---------------------------|---------------|---------------|---------------------|-----------------|
| hTau40                 | 2N4R           | none     | +                         | +             | 0             | +++                 | +++             |
| hTau34                 | 1N4R           | "        | ++                        | +             | +             | ++                  | n.d.            |
| hTau24                 | 0N4R           | "        | +++                       | +             | +             | +                   | +               |
| hTau39                 | 2N3R           | "        | ++                        | ++            | ++            | ++                  | +++             |
| hTau37                 | 1N3R           | "        | +                         | +             | +             | +                   | n.d.            |
| hTau23                 | 0N3R           | "        | +++                       | ++            | +++           | 0                   | +               |
|                        | 2N4R           | 4KxGA    | +                         | +             | 0             | +                   | +               |
|                        | "              | 4KXGE    | +++                       | +             | +             | +                   | +               |
|                        | "              | A152T    | ++                        | +++           | ++            | ++                  | ++              |
|                        | "              | ΔK280    | ++                        | +             | +             | +                   | ++              |
|                        | "              | ΔK280-PP | ++                        | ++            | ++            | ++                  | +++             |

Legend: 0: not apparent; +: apparent; ++ strong; +++ very strong; n.d. not determined

\*positive change in spine parameters relative to control conditions

\*\*spine head apparent (as indicator of maturity)

Supplemental Table 2: List of antibodies used in the study, for details see methods.

| antibody (clone/name)      | dilution       | species | company/provider  |
|----------------------------|----------------|---------|-------------------|
| Aβ (DE2)                   | 1:50-1:300     | mouse   | Millipore         |
| acetylated Tubulin (611B1) | 1:500-1:1000   | mouse   | Sigma             |
| Ankyrin-G (N106/36)        | 1:200-1:300    | mouse   | NeuroMab          |
| CP27                       | 1:100          | mouse   | Davies            |
| EB1 (5/EB1)                | 1:100          | mouse   | BD Laboratories   |
| EB3                        | 1:200          | rabbit  | Thermo Scientific |
| F-Actin (CF350 Phalloidin) | 1:50-1:100     |         | Biotium           |
| F-Actin (CF405 Phalloidin) | 1:50           |         | Biotium           |
| GSK3β pS9                  | 1:50-1:100     | rabbit  | Cell signaling    |
| MAP2                       | 1:5000-1:10000 | chicken | abcam             |
| NrCam                      | 1:200-1:1000   | rabbit  | abcam             |
| Polyglutamyl. Tubulin (B3) | 1:500-1:1000   | mouse   | Sigma             |
| p-cofilin (Ser3) (4317)    | 1:200          | rabbit  | James Bamberg     |
| pTau (12E8)                | 1:200-1:500    | mouse   | Elan              |
| Tau (DA9)                  | 1:40-1:500     | mouse   | Davies            |
| Tau (K9JA)                 | 1:100-1:500    | rabbit  | Dako              |
| Thyrosin. Tubulin (YL1/2)  | 1:300-1:1000   | rat     | serotec           |
| Tubulin (DM1α)             | 1:300          | mouse   | Sigma             |
| 2N Tau (71C11)             | 1:500          | mouse   | BioLegend         |

Figure S1

Transfected Tau<sup>D2</sup> (isoform xNxR) into Tau knockout mouse neurons

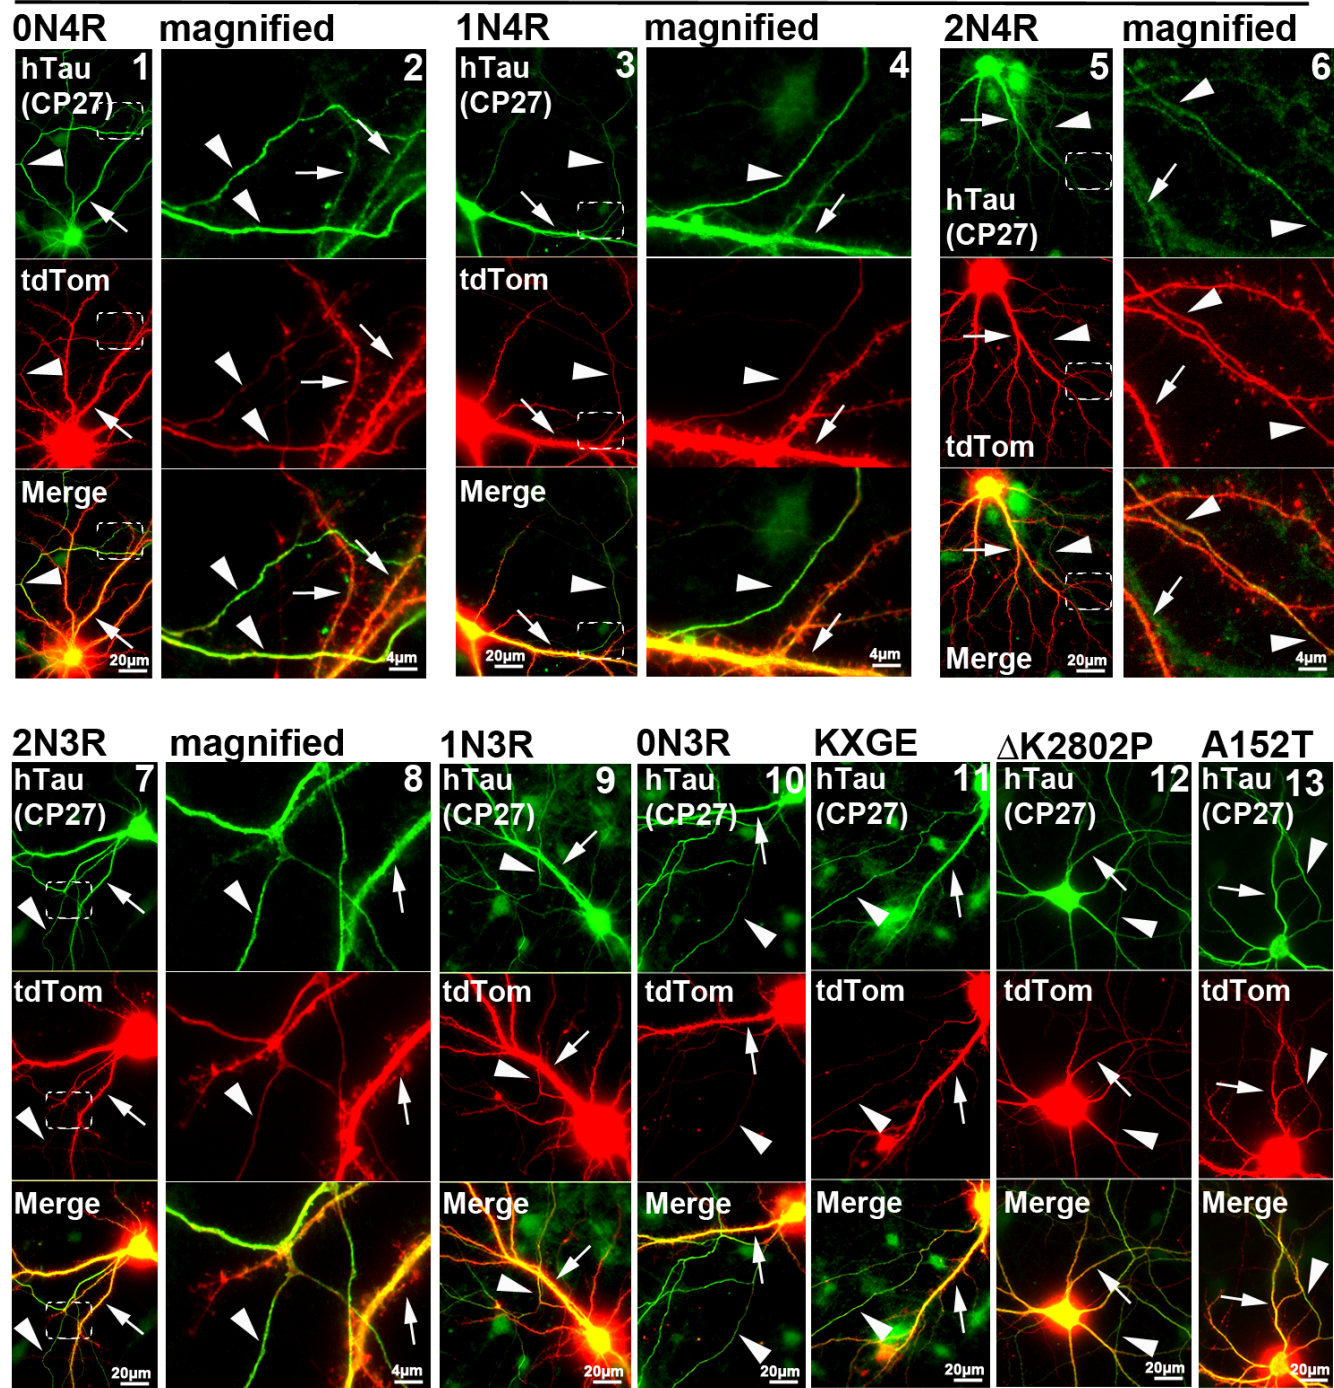

Figure S2

**Transfected Tau<sup>D2</sup> (isoform xNxR) + endogenous Tau (wildtype mouse neurons)**

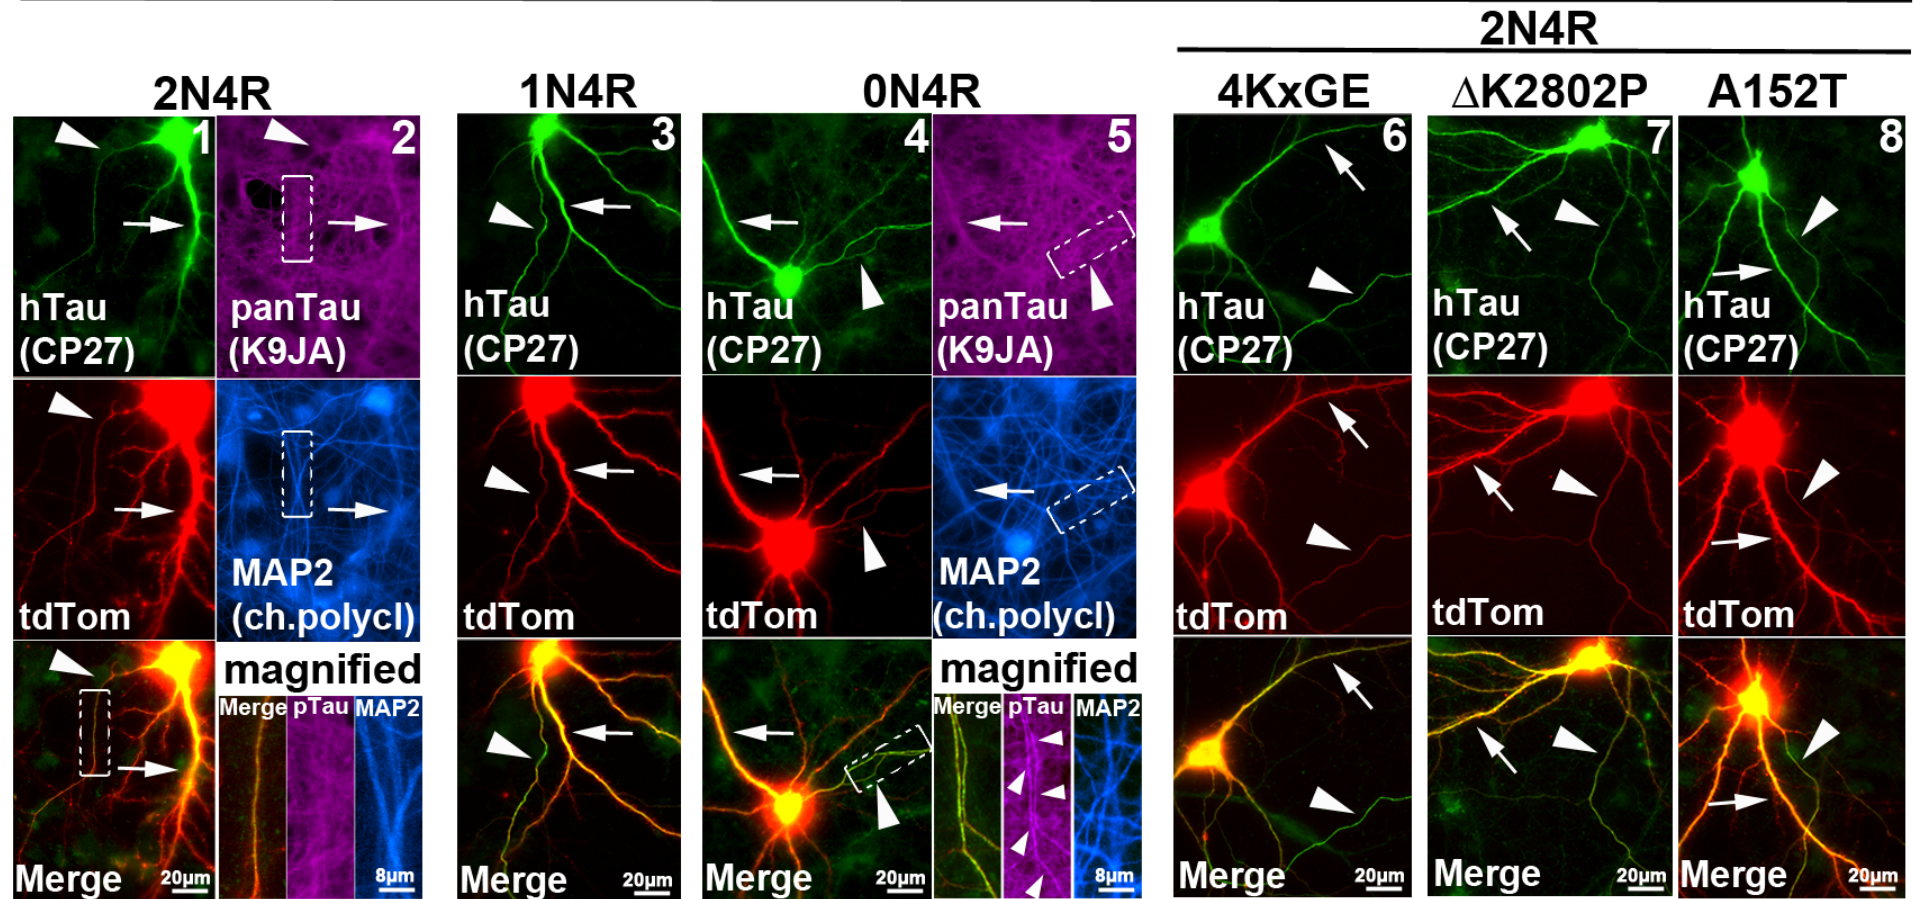

Figure S3

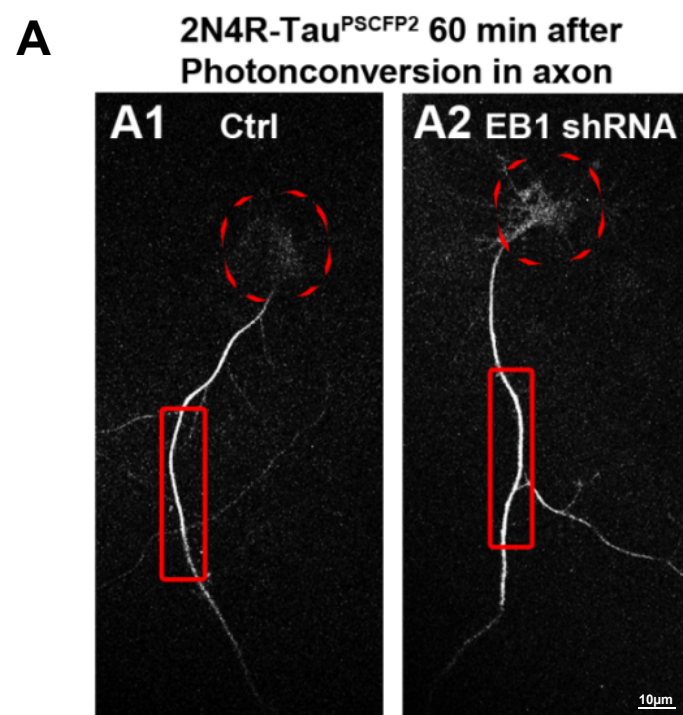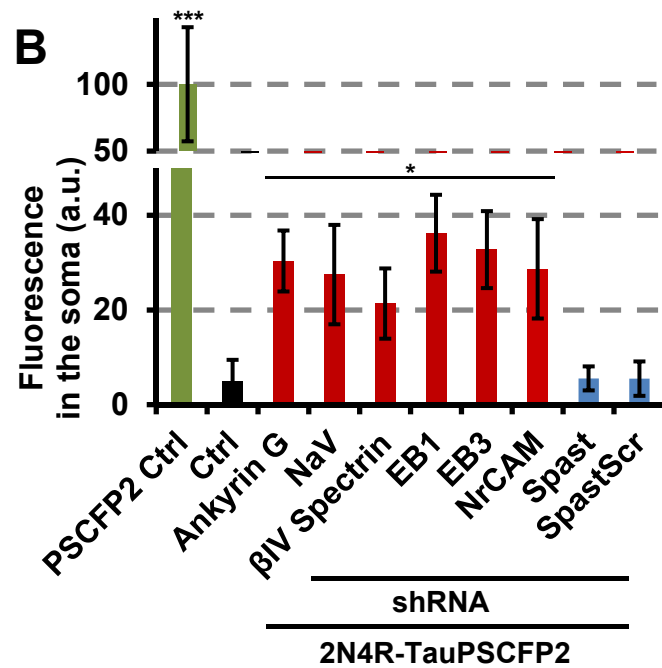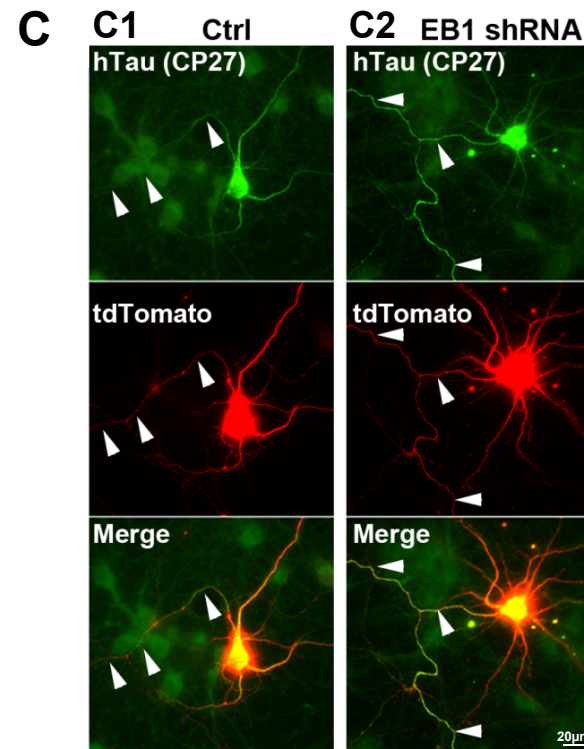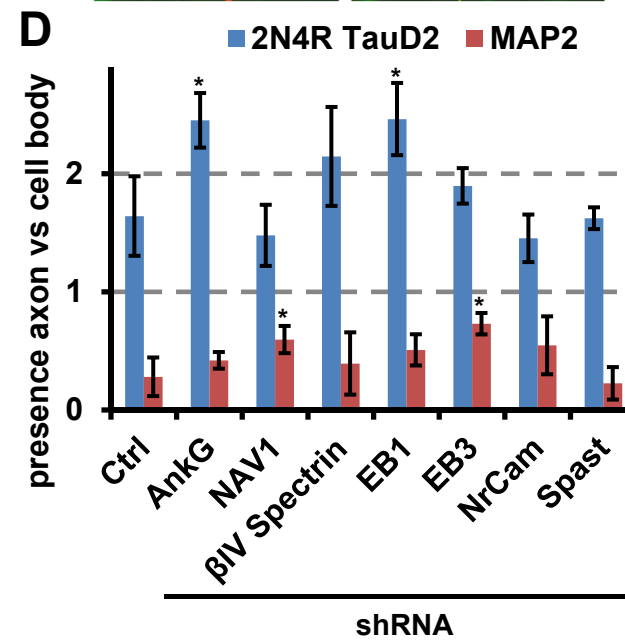



Figure S4

**A1 Ctrl (empty shRNA vector)**

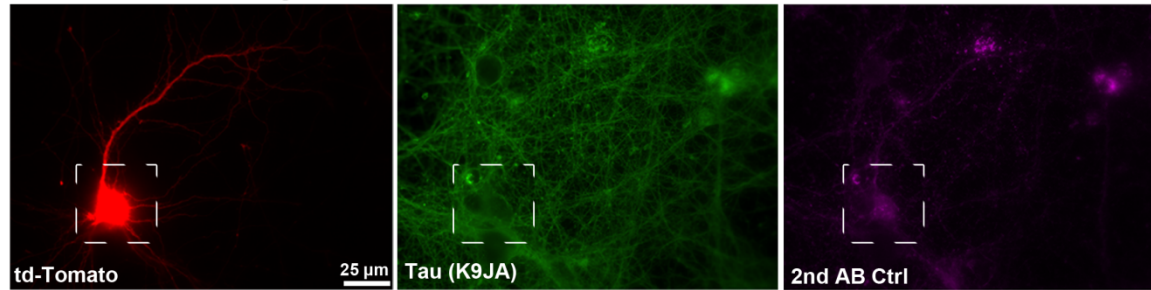

**A2 shRNA EB1**

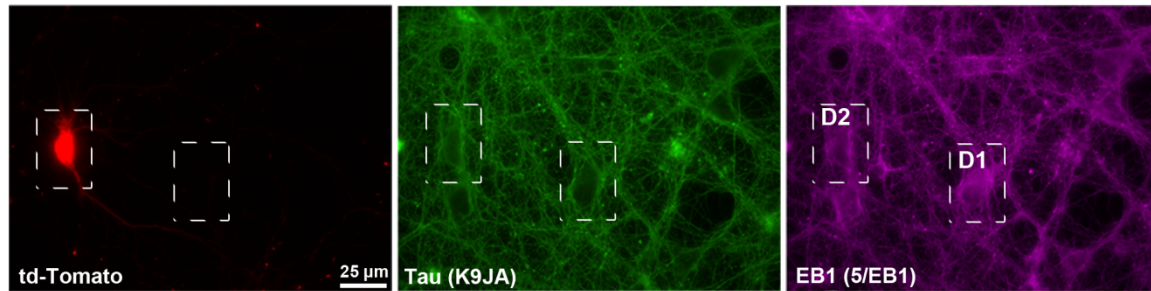

**A3 shRNA NrCAM**

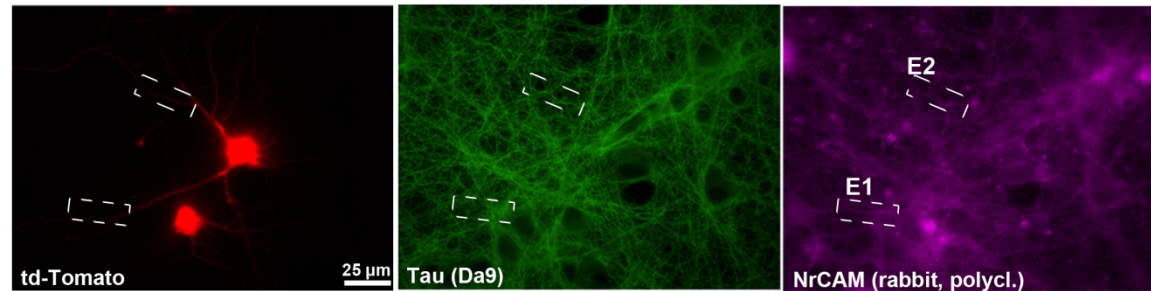

**B magnification of A1 and A2**

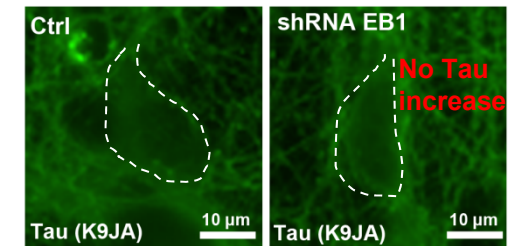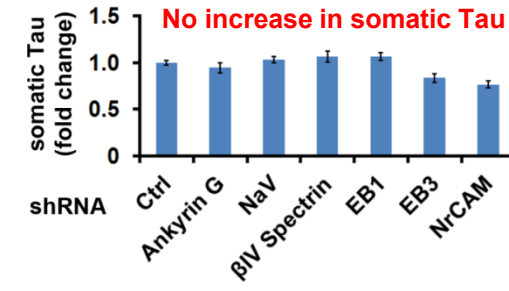

**Magnification of boxes in A2/A3**

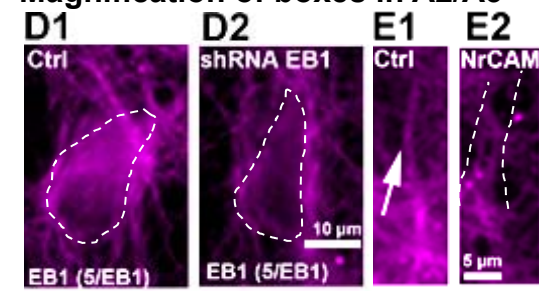

Figure S5

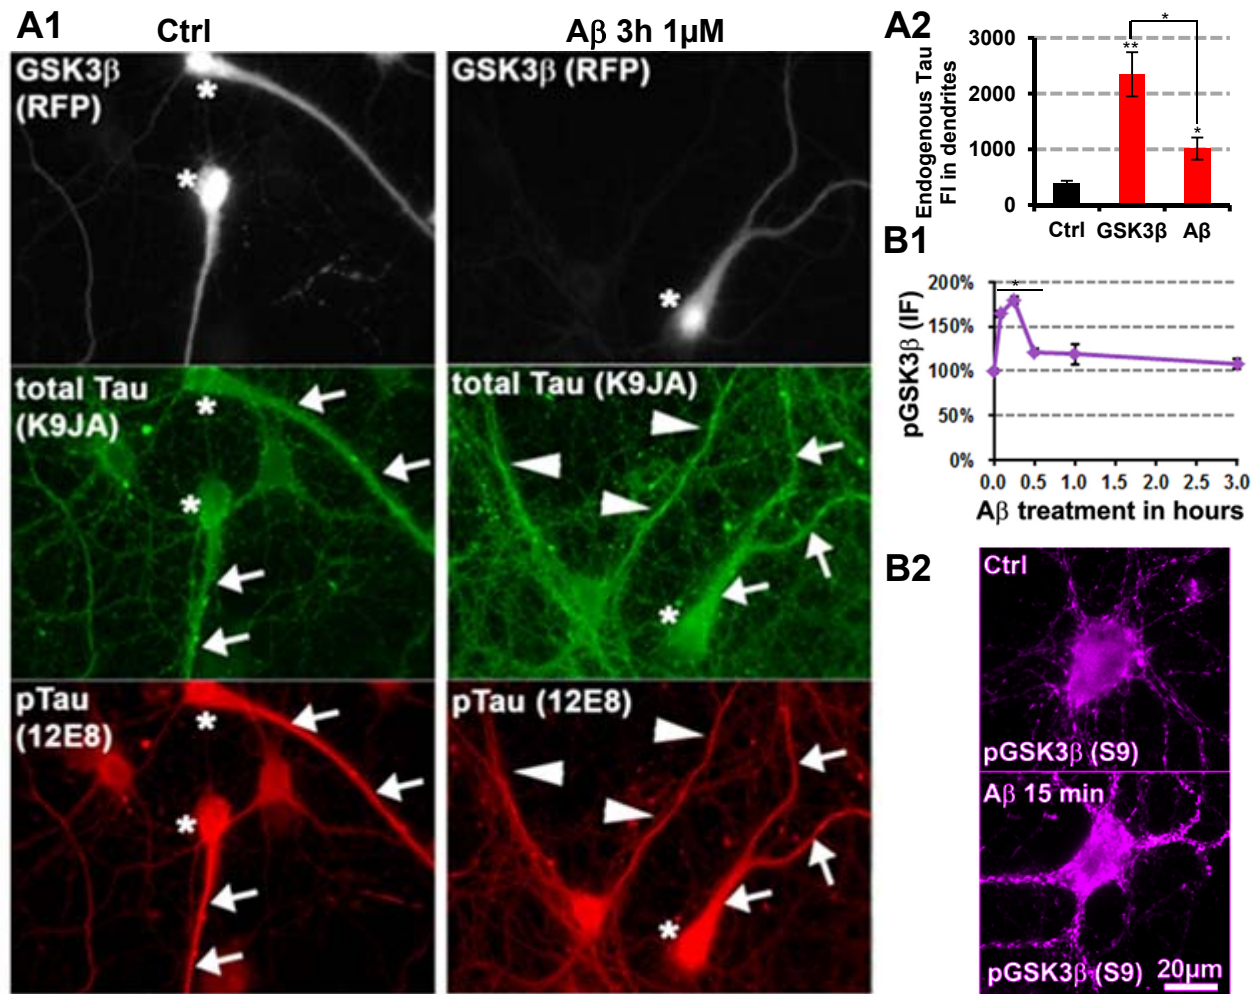

Figure S6

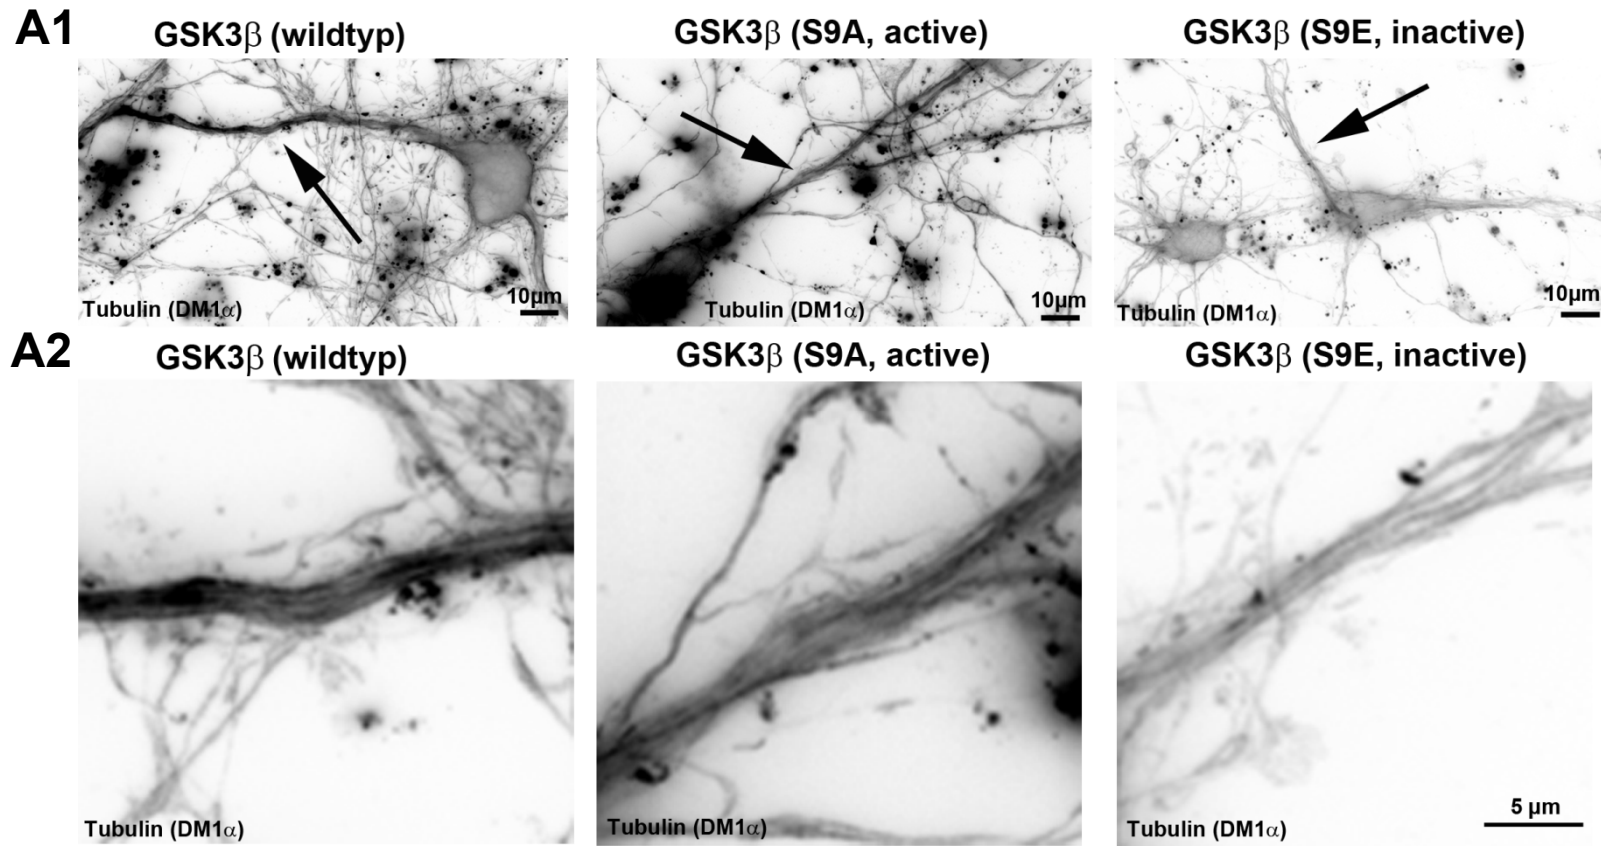

Figure S7

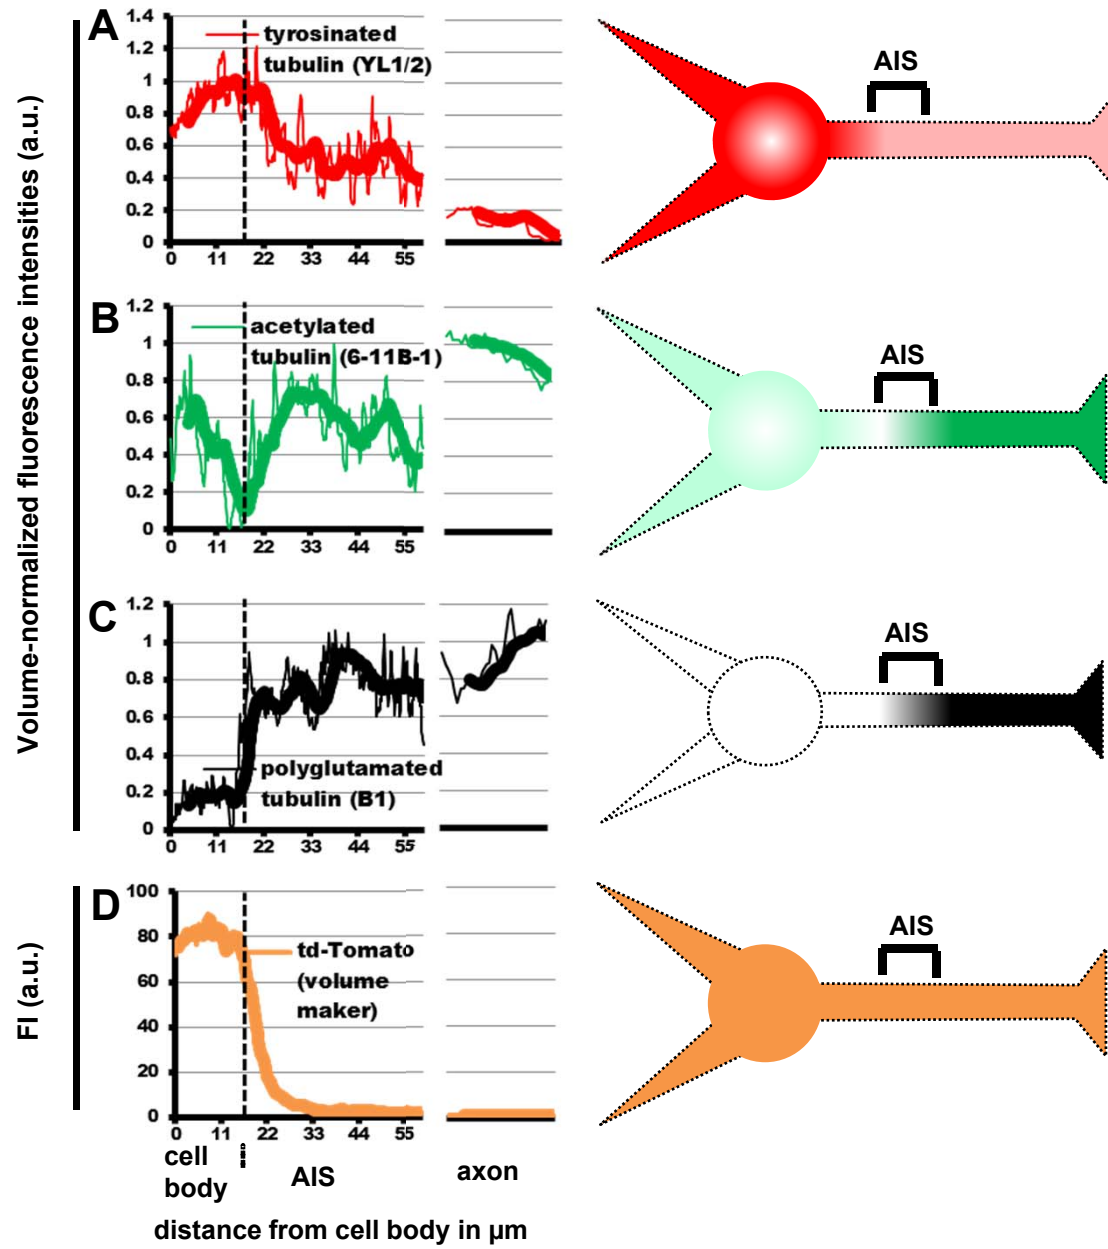

Figure S8

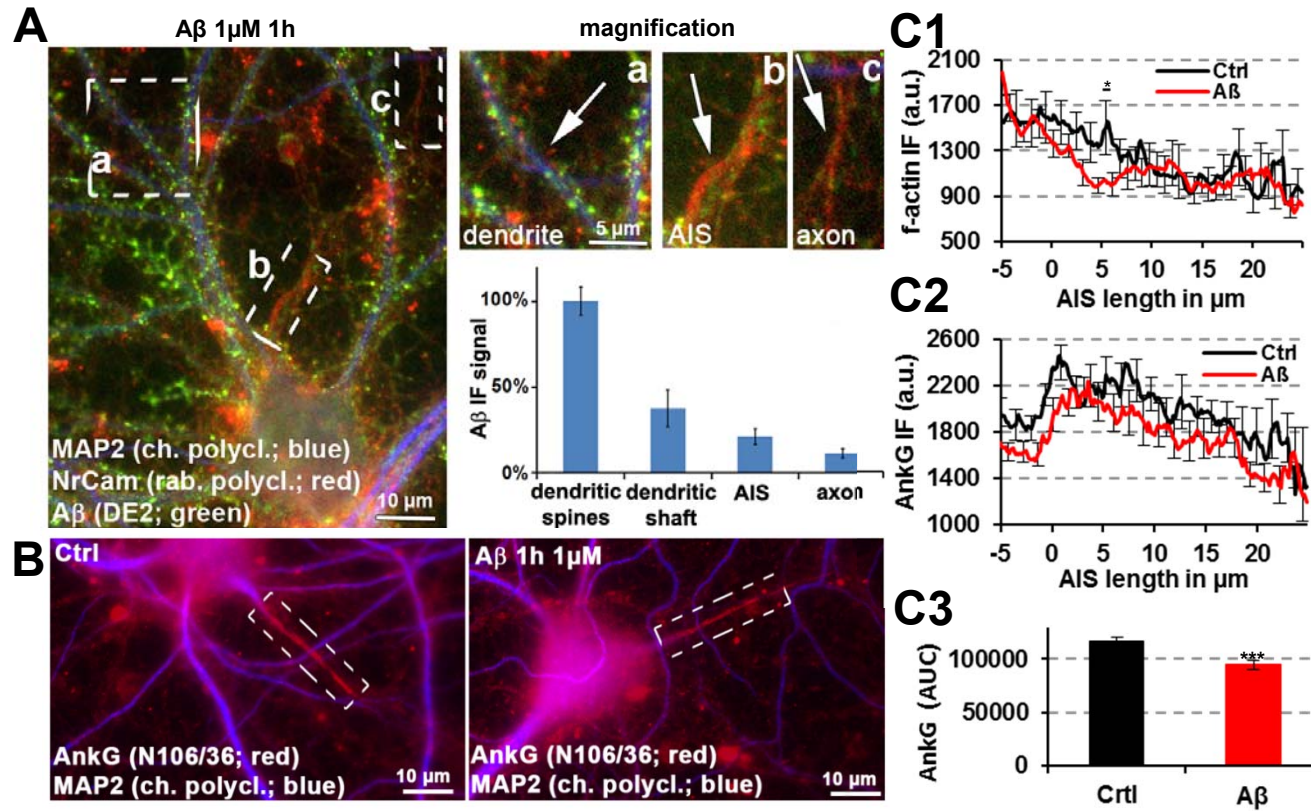

Figure S9

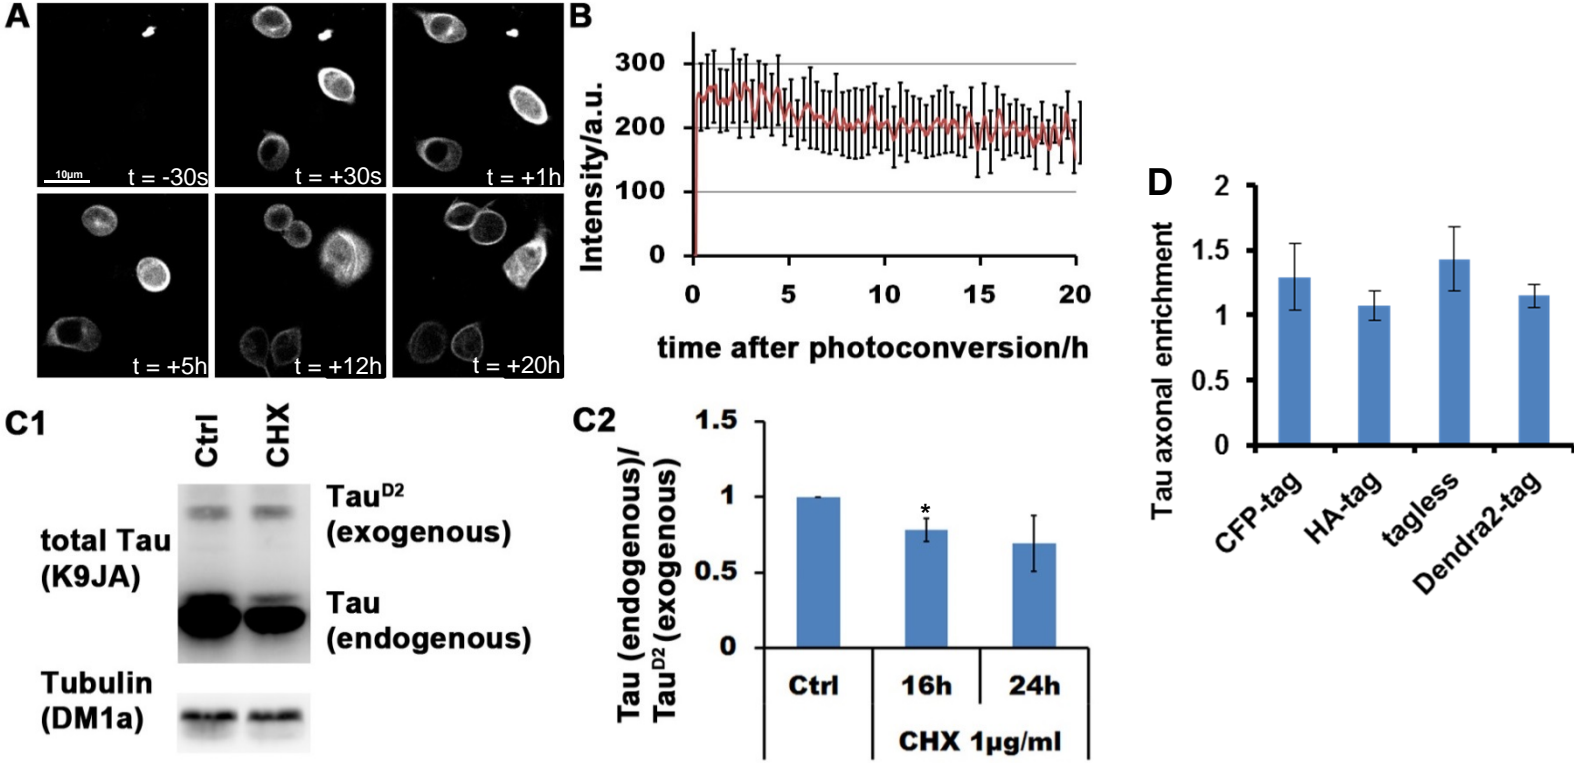

Supplement: 10.1074_M117.784702_jbc.M117.784702-1.pdf [file 10.1074_M117.784702_jbc.M117.784702-1.pdf]
